# Supplementary material
Source: PubMed Central journal article supplement (PMC3864385)

## Protease amino-acid variants

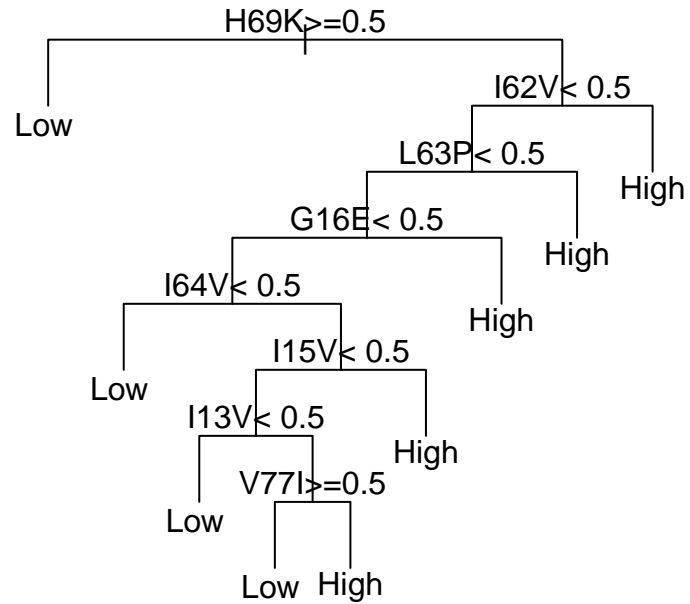

## Reverse transcriptase amino-acid variants

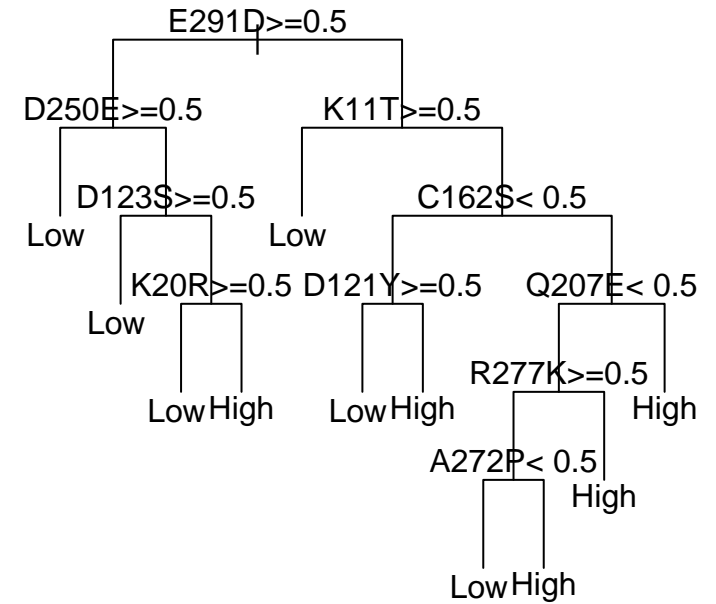

Supplement: supp_jit425_jit425supp_fig1.pdf [file supp_jit425_jit425supp_fig1.pdf]
